# Supplementary material
Source: publisher figshare collection journal article supplement (https://gsajournals.figshare.com/ndownloader/files/25473230)
Supplement: Supplementary file 1 [file 25473230]

|  |  |
| --- | --- |
| **TABLE S1. FLY STRAINS** |  |
|  |  |
| **Genotype** | **Source** |
| *w;; tub>myc, y+STOP>Gal4/TM6B* | de la Cova *et al*, 2004 |
| *w;; act>CD2STOP>Gal4, UAS-GFP/TM6B* | de la Cova *et al*, 2004 |
| *yw hsflp122;;UAS-Myc42* | Johnston *et al*, 1999; BDSC#9675 |
| *w; HmlΔ-DsRednls* | K. Brückner;Makhijani *et al*, 2011 |
| *w; egr1/CyO act-GFP* | M. Miura; Igaki *et al*, 2002 |
| *w; egr3/CyO act-GFP* | M. Miura; Igaki *et al*, 2002 |
| *w; egr1AG (#11)/CyO act-GFP* | I. Hariharan; this work |
| *w; egr3AG (#6)/CyO act-GFP* | I. Hariharan; this work |
| *w; egr31/CyO* | M. Miura and H. Kanda |
| *w; egrRegg1/CyO* | M. Miura; Igaki *et al*, 2002 |
| *OregonR* | I. Hariharan |
|  |  |
|  |  |
